# Supplementary material for: Innate Immune Response to Streptococcus pyogenes Depends on the Combined Activation of TLR13 and TLR2
Source: PubMed Central journal article supplement (PMC4355416; doi:10.1371/journal.pone.0119727), 2015-03-10
Supplement: pone.0119727.s001.pdf [file pone.0119727.s001.pdf]

**Table S1. Tlr13 is missing in primates but occurs in mice and rarely in other mammals while it can be found in non-mammalian vertebrates, insects, Annelida and plants.**

The table lists a choice of mammalian species in which Tlr13 was searched for, as well as representative vertebrate, insect, Annelida and plant species containing Tlr13. The Tlr13 orthologs were searched for and identified using the OMA browser (light blue) or a standard NCBI Blast search against non-redundant protein sequences (dark blue). Putative hits were tested for occurrence of similar feature architecture as in the query protein, i.e. mouse Tlr13, using FACT (Feature Architecture Comparison Tool; <http://www.cibiv.at/FACT>). Hits exhibiting similar protein architecture as mouse Tlr13 were defined as predicted orthologs and are depicted in light blue (hits obtained using the OMA browser) or dark blue (hits obtained using NCBI Blast).

| Species                       | Common name                    | Tlr13 | Order             | Class          | Kingdom  |
|-------------------------------|--------------------------------|-------|-------------------|----------------|----------|
| Rattus norvegicus             | brown or norway rat            | YES   | Rodentia          | Mammalia       | Animalia |
| Mus musculus                  | house mouse                    | YES   | Rodentia          | Mammalia       | Animalia |
| Spermophilus tridecemlineatus | thirteen-lined ground squirrel | NO    | Rodentia          | Mammalia       | Animalia |
| Cavia porcellus               | guinea pig                     | NO    | Rodentia          | Mammalia       | Animalia |
| Dipodomys ordii               | ord's kangaroo rat             | NO    | Rodentia          | Mammalia       | Animalia |
| Cricetulus griseus            | Chinese hamster                | YES   | Rodentia          | Mammalia       | Animalia |
| Oryctolagus cuniculus         | europaean rabbit               | YES   | Lagomorpha        | Mammalia       | Animalia |
| Homo sapiens                  | human                          | NO    | Primates          | Mammalia       | Animalia |
| Gorilla gorilla               | western gorilla                | NO    | Primates          | Mammalia       | Animalia |
| Pan troglodytes               | common chimpanzee              | NO    | Primates          | Mammalia       | Animalia |
| Pongo abelii                  | Sumatran orangutan             | NO    | Primates          | Mammalia       | Animalia |
| Nomascus leucogenys           | white-cheeked gibbon           | NO    | Primates          | Mammalia       | Animalia |
| Macaca mulatta                | rhesus macaque                 | NO    | Primates          | Mammalia       | Animalia |
| Callithrix jacchus            | common marmoset                | NO    | Primates          | Mammalia       | Animalia |
| Tupaia chinensis              | chinese tree shrew             | YES   | Scandentia        | Mammalia       | Animalia |
| Loxodonta africana            | african bush elephant          | YES   | Proboscidea       | Mammalia       | Animalia |
| Equus caballus                | horse                          | NO    | Perissodactyla    | Mammalia       | Animalia |
| Canis familiaris              | domestic dog                   | NO    | Carnivora         | Mammalia       | Animalia |
| Ailuropoda melanoleuca        | giant panda                    | YES   | Carnivora         | Mammalia       | Animalia |
| Felis catus                   | domestic cat                   | NO    | Carnivora         | Mammalia       | Animalia |
| Bos taurus                    | europaean cattle               | NO    | Artiodactyla      | Mammalia       | Animalia |
| Sus scrofa                    | wild pig                       | NO    | Artiodactyla      | Mammalia       | Animalia |
| Myotis lucifugus              | little brown bat               | YES   | Chiroptera        | Mammalia       | Animalia |
| Dasyus novemcinctus           | nine-banded armadillo          | NO    | Cingulata         | Mammalia       | Animalia |
| Sarcophilus harrisii          | Tasmanian devil                | YES   | Dasyuromorphia    | Mammalia       | Animalia |
| Macropus eugenii              | tammar wallaby                 | NO    | Diprotodontia     | Mammalia       | Animalia |
| Monodelphis domestica         | gray short-tailed opossum      | YES   | Didelphimorphia   | Mammalia       | Animalia |
| Ornithorhynchus anatinus      | platypus                       | YES   | Monotremata       | Mammalia       | Animalia |
| Anolis carolinensis           | american cameleon              | YES   | Squamata          | Reptilia       | Animalia |
| Chelonia mydas                | green sea turtle               | YES   | Testudines        | Reptilia       | Animalia |
| Gallus gallus                 | red junglefowl                 | YES   | Galliformes       | Aves           | Animalia |
| Xenopus tropicalis            | western clawed frog            | YES   | Anura             | Amphibia       | Animalia |
| Gasterosteus aculeatus        | three-spined stickleback       | YES   | Gasterosteiformes | Actinopterygii | Animalia |
| Salmo salar                   | atlantic salmon                | YES   | Salmoniformes     | Actinopterygii | Animalia |
| Epinephelus coioides          | orange-spotted grouper         | YES   | Perciformes       | Actinopterygii | Animalia |
| Oreochromis niloticus         | nile tilapia                   | YES   | Perciformes       | Actinopterygii | Animalia |
| Drosophila melanogaster       | common fruit fly               | YES   | Diptera           | Insecta        | Animalia |
| Aedes aegypti                 | yellow fever mosquito          | YES   | Diptera           | Insecta        | Animalia |
| Apis mellifera                | western honey bee              | YES   | Hymenoptera       | Insecta        | Animalia |
| Pediculus humanus             | body or head louse             | YES   | Phthiraptera      | Insecta        | Animalia |
| Helobdella robusta            | california leech               | YES   | Rhynchobdellida   | Clitellata     | Animalia |
| Oryza sativa                  | rice                           | YES   | Poales            | Monocots       | Plantae  |
| Zea mays                      | corn                           | YES   | Poales            | Monocots       | Plantae  |
